# Supplementary material
Source: PubMed Central journal article supplement (PMC2871523)
Supplement: jbiol211-S1.pdf [file jbiol211-S1.pdf]

# SnoPatrol: How many snoRNA genes are there? – Supplementary materials.

Paul P. Gardner<sup>\*1</sup>, Alex G. Bateman<sup>1</sup> and Anthony M. Poole<sup>2,3</sup>

<sup>1</sup>Wellcome Trust Sanger Institute, Wellcome Trust Genome Campus, Hinxton, CB10 1SA, UK

<sup>2</sup>Department of Molecular Biology & Functional Genomics, Stockholm University, SE-106 91 Stockholm, Sweden

<sup>3</sup>School of Biological Sciences, University of Canterbury, Christchurch 8140, New Zealand

Email: Paul P. Gardner<sup>\*</sup>- pg5@sanger.ac.uk; Alex G. Bateman<sup>\*</sup>- agb@sanger.ac.uk; Anthony M. Poole - anthony.poole@canterbury.ac.nz;

<sup>\*</sup>Corresponding author

## Supplementary Methods

In order to investigate the taxonomic distribution of the known snoRNAs and highlight where potential new discoveries can be made we have gathered data from the Pfam, Rfam, Genomes Online Database (GOLD) and EMBL databases. To locate the essential protein components of snoRNPs we used domains annotated by the Pfam database. We chose 6 snoRNP associated domains Nop, Nop10p, Gar1, SHQ1, Fibrillarlin and TruB\_N, the counts of which are shown in the blue bars in Figure 2. We also ran the control experiment of ensuring that the genomes for each taxa contain rRNAs by using the annotation for the partial SSU model from the Rfam database, the counts of which are shown in the green bars in Figure 2 for each taxa. These two datasets indicate that the snoRNP machinery is present in all the known Archaea and Eukaryotic taxa, the notable exception being the absence of snoRNP protein domains in the Oömycetes, stramenopiles group. However, it appears that this lack is due to the protein sequences not being included in the public sequence databases yet rather than a bona fide vestigialization of this machinery. Yet for many major taxonomic clades there are few or no known snoRNAs. To investigate these we used species counts of the snoRNAs annotated by the Rfam database the results of these are displayed in the red bars in Figure 2. Of these there are many experimentally validated snoRNA sequences published in the literature and therefore submitted to one of the nucleotide archives Genbank, EMBL or the DDBJ, for further verification we mined the annotation of those sequences in the Rfam database for terms associated with snoRNAs, the counts of these are shown in the pink bars in Figure 2. Finally, in order to be certain that

the counts we observed aren't due to an under-sampling of sequences from certain taxonomic groupings we used data from the GOLD genomes database, genomes annotated as either "Complete", "Draft" or "In progress"; assuming these genome sequences have all been submitted to the public nucleotide archives (the annotation of which is included in the UniProt database searched by Pfam) then this should give a good representation of where sequences are available and therefore annotation of snoRNAs possible.

## Supplementary Table 1

- Col. 1: taxon string (top three levels of the NCBI taxonomy)
- Col. 2: number of sequence regions annotated by the Pfam Nop, Nop10p and Gar1 families
- Col. 3: number of sequence regions annotated by the Rfam SSU rRNA family
- Col. 4: number of genomes annotated as either completed, draft or in progress from the GOLD database
- Col. 5: number of sequence regions annotated by all the Rfam snoRNA families
- Col. 6: number of sequence regions annotated by all the Rfam snoRNA families where EMBL sequences have been published as snoRNAs.

| TaxString                                 | Pfam | SSU  | GOLD | predSnos | knownSnos |
|-------------------------------------------|------|------|------|----------|-----------|
| Archaea;Crenarchaeota;Thermoprotei;       | 157  | 475  | 27   | 128      | 11        |
| Archaea;Euryarchaeota;Aciduliprofundum.   | 10   | 3    | 1    | 2        | 0         |
| Archaea;Euryarchaeota;Archaeoglobi;       | 6    | 43   | 1    | 8        | 3         |
| Archaea;Euryarchaeota;Halobacteria;       | 59   | 1526 | 15   | 0        | 0         |
| Archaea;Euryarchaeota;Methanobacteria;    | 23   | 1486 | 5    | 0        | 0         |
| Archaea;Euryarchaeota;Methanococci;       | 45   | 107  | 6    | 26       | 0         |
| Archaea;Euryarchaeota;Methanomicrobia;    | 64   | 1383 | 11   | 10       | 0         |
| Archaea;Euryarchaeota;Methanopyri;        | 6    | 5    | 1    | 1        | 0         |
| Archaea;Euryarchaeota;Thermococci;        | 48   | 300  | 7    | 324      | 19        |
| Archaea;Euryarchaeota;Thermoplasmata;     | 14   | 220  | 3    | 0        | 0         |
| Archaea;Korarchaeota;Candidatus           | 3    | 1    | 1    | 0        | 0         |
| Archaea;Nanoarchaeota;Nanoarchaeum.       | 3    | 2    | 1    | 0        | 0         |
| Archaea;Thaumarchaeota;Cenarchaeales;     | 4    | 0    | 0    | 0        | 0         |
| Archaea;Thaumarchaeota;marine             | 18   | 0    | 0    | 0        | 0         |
| Eukaryota;Alveolata;Apicomplexa;          | 132  | 2675 | 25   | 58       | 1         |
| Eukaryota;Alveolata;Ciliophora;           | 28   | 1438 | 1    | 10       | 0         |
| Eukaryota;Alveolata;Perkinsea;            | 20   | 175  | 1    | 29       | 0         |
| Eukaryota;Amoebozoa;Archamoebae;          | 16   | 326  | 3    | 3        | 0         |
| Eukaryota;Amoebozoa;Mycetozoa;            | 13   | 239  | 1    | 2        | 0         |
| Eukaryota;Amoebozoa;Tubulinea;            | 1    | 84   | 0    | 0        | 0         |
| Eukaryota;Choanoflagellida;Codonosigidae; | 9    | 18   | 1    | 6        | 0         |
| Eukaryota;Cryptophyta;Pyrenomonadales;    | 3    | 119  | 1    | 0        | 0         |

|                                          |     |       |     |       |     |
|------------------------------------------|-----|-------|-----|-------|-----|
| Eukaryota;Diplomonadida;Hexamitidae;     | 9   | 90    | 2   | 0     | 0   |
| Eukaryota;Euglenozoa;Euglenida;          | 4   | 458   | 0   | 0     | 0   |
| Eukaryota;Euglenozoa;Kinetoplastida;     | 70  | 669   | 3   | 174   | 26  |
| Eukaryota;Fungi;Dikarya;                 | 546 | 11898 | 154 | 3591  | 181 |
| Eukaryota;Fungi;Microsporidia;           | 18  | 540   | 2   | 0     | 0   |
| Eukaryota;Metazoa;Annelida;              | 1   | 1078  | 1   | 0     | 0   |
| Eukaryota;Metazoa;Arthropoda;            | 208 | 10738 | 40  | 2032  | 120 |
| Eukaryota;Metazoa;Brachiopoda;           | 1   | 74    | 0   | 0     | 0   |
| Eukaryota;Metazoa;Chordata;              | 188 | 17465 | 90  | 85287 | 952 |
| Eukaryota;Metazoa;Cnidaria;              | 9   | 1167  | 2   | 144   | 0   |
| Eukaryota;Metazoa;Echinodermata;         | 2   | 254   | 1   | 168   | 0   |
| Eukaryota;Metazoa;Echiura;               | 1   | 6     | 0   | 0     | 0   |
| Eukaryota;Metazoa;Mollusca;              | 1   | 2045  | 1   | 140   | 0   |
| Eukaryota;Metazoa;Nematoda;              | 31  | 2420  | 12  | 304   | 49  |
| Eukaryota;Metazoa;Nematomorpha;          | 1   | 19    | 0   | 0     | 0   |
| Eukaryota;Metazoa;Placozoa;              | 9   | 15    | 1   | 19    | 0   |
| Eukaryota;Metazoa;Platyhelminthes;       | 22  | 1521  | 2   | 38    | 0   |
| Eukaryota;Metazoa;Porifera;              | 1   | 281   | 0   | 0     | 0   |
| Eukaryota;Metazoa;Priapulida;            | 1   | 23    | 0   | 0     | 0   |
| Eukaryota;Metazoa;Sipuncula;             | 1   | 104   | 0   | 0     | 0   |
| Eukaryota;Parabasalidea;Trichomonada;    | 12  | 350   | 1   | 1     | 0   |
| Eukaryota;Rhizaria;Cercozoa;             | 3   | 866   | 1   | 0     | 0   |
| Eukaryota;Viridiplantae;Chlorophyta;     | 48  | 2288  | 6   | 73    | 20  |
| Eukaryota;Viridiplantae;Streptophyta;    | 194 | 5791  | 44  | 15529 | 680 |
| Eukaryota;stramenopiles;Bacillariophyta; | 21  | 1125  | 2   | 9     | 0   |
| Eukaryota;stramenopiles;Oomycetes;       | 0   | 261   | 4   | 75    | 0   |

## Supplementary Methods

The *Trichomonas vaginalis* G3 C/D box snoRNA (RF00335, Small nucleolar RNA Z13/snr52) discussed in the text of the article.

The results of the cmsearch [1] match between the RF00335 model and the *T. vaginalis* snoRNA candidate:

```
>AAHC01000432.1/36420-36361
```

```
Query = 1 - 101, Target = 76 - 135
Score = 26.12, E = 104.1, P = 3.938e-09, GC = 33
```

```

::<<<----- .-<<<<~~~~>>>>----->>
1 uucucuaaaaUGAUGAAAUAUU..uCGGA*[47]*UCCGUUGCCUCCUUCUGAUuaaga 99
+C::U+A AUGAUG A A U :GGA UCC:UUGCCUCCUU UGAUU++::
76 GACAAUUAGAUGAUGCAUAAAUgagUGGA*[ 5]*UCCAUGCCUCCUU-UGAUUUUUU 133

```

```
>:
100 gu 101
GU
134 GU 135
```

A Stockholm format alignment showing the alignment between the known Fungal snR52/Z13 snoRNAs and the *T.vaginalis* snoRNA candidate:

# STOCKHOLM 1.0

```
#=GF AC RF00335
#=GF ID snoZ13_snr52
#=GF DE Small nucleolar RNA Z13/snr52
#=GF AU Moxon SJ
#=GF SE Moxon SJ, INFERNAL
#=GF SS Predicted; PFOLD; Moxon SJ
#=GF GA 20.16
#=GF TC 22.70
#=GF NC undefined
#=GF TP Gene; snRNA; snoRNA; CD-box;
#=GF BM cmbuild -F CM SEED; cmcalibrate --mpi -s 1 CM
#=GF BM cmsearch -Z 169604 -E 1000 --toponly CM SEQDB
#=GF DR SO:0000593 SO:C_D_box_snoRNA
#=GF DR GO:0006396 GO:RNA processing
#=GF DR GO:0005730 GO:nucleolus
#=GF RN [1]
#=GF RM 12007400
#=GF RT Small nucleolar RNAs: an abundant group of noncoding RNAs with
#=GF RT diverse cellular functions.
#=GF RA Kiss T;
#=GF RL Cell 2002;109:145-148.
#=GF CC Z13 or snr52 is a member of the C/D class of snoRNA which contain the C
#=GF CC (UGAUGA) and D (CUGA) box motifs. Most of the members of the box C/D
#=GF CC family function in directing site-specific 2'-O-methylation of substrate
#=GF CC RNAs [1].
#=GF WK http://en.wikipedia.org/wiki/Small_nucleolar_RNA_Z13/snr52
```

```
#=GS S.pombe_Z13_snoRNA CC AJ223843.1/1-95, score=89.65 E value=3.11e-16
#=GS S.pombe_snr52_snoRNA CC AJ251862.1/1-95, score=89.65 E value=3.11e-16
#=GS N.crassa_CD42_snoRNA CC EU780965.1/2-92, score=79.46 E value=2.01e-13
#=GS A.fumigatus_Af293_snoRNA CC AM921928.1/6-91, score=79.30 E value=2.22e-13
#=GS S.pombe_snr52_snoRNA2 CC AJ617322.1/3-83, score=67.73 E value=3.46e-10
#=GS T.vaginalis_snoRNA CC AAHC01000432.1/36420-36361, score=26.12 E value=1.04e+02
#=GS S.cerevisiae_Z13_snoRNA CC AJ223033.1/15-106, score=9.86 E value=3.17e+06
#=GS S.cerevisiae_snr52_snoRNA CC AF064264.1/1-92, score=9.86 E value=3.17e+06
```

```
#=GS S.pombe_Z13_snoRNA CC S.pombe Schizosaccharomyces pombe Z13 small nucleolar RNA ge
#=GS S.pombe_snr52_snoRNA CC S.pombe Schizosaccharomyces pombe snr52 gene for small nucle
#=GS N.crassa_CD42_snoRNA CC N.crassa Neurospora crassa box C/D snoRNA CD42, complete sequ
#=GS A.fumigatus_Af293_snoRNA CC A.fumigatus Aspergillus fumigatus Af293 putative C/D box snoRNA
#=GS S.pombe_snr52_snoRNA2 CC S.pombe Schizosaccharomyces pombe snR52 snoRNA
#=GS T.vaginalis_snoRNA CC T.vaginalis Trichomonas vaginalis G3, whole genome shotgun sequ
#=GS S.cerevisiae_Z13_snoRNA CC S.cerevisiae Saccharomyces cerevisiae Z13 small nucleolar RNA gen
#=GS S.cerevisiae_snr52_snoRNA CC S.cerevisiae Saccharomyces cerevisiae snR52 small nucleolar RNA,
```

```

S.pombe_Z13_snoRNA      AUUUUGAAAAUGAUGAAAAU..AA.cGCGGAUGAAAAUUAU-----GU
S.pombe_snr52_snoRNA   AUUUUGAAAAUGAUGAAAAU..AA.cGCGGAUGAAAAUUAU-----GU
N.crassa_CD42_snoRNA   AC-----CCUGAUGAAAAU..UU.cUCGGAUGUAAAAUUUUACUUUUGU
A.fumigatus_Af293_snoRNA -----UGAUGAAAAU..UU..UCGGAUGUAAACUCACAGACCUGU
S.pombe_snr52_snoRNA2  -----AAAAUGAUGAAAAU..AA.cGCGGAUGAAAAUUAU-----GU
T.vaginalis_snoRNA     GACAAUUAGAUGAUGCAUAA..AUgaGUGGA-----
S.cerevisiae_Z13_snoRNA UA-----CUAUGAUGAAUGacaUU.aGCGUGAACAAUCUCUGAUACAAAA
S.cerevisiae_snr52_snoRNA UA-----CUAUGAUGAAUGacaUU.aGCGUGAACAAUCUCUGAUACAAAA
#=GC SS_cons           :<<<<-----..--..<<<<-----
#=GC MT_cons           .....CCCCC.....|<25S_rRNA>|.....

S.pombe_Z13_snoRNA      CCGAGA.G.....CGCAAAAAAUGUGUGGAUAUUUCCGUUGC
S.pombe_snr52_snoRNA   CCGAGA.G.....CGCAAAAAAUGUGUGGAUAUUUCCGUUGC
N.crassa_CD42_snoRNA   CUGAAAaG.....CGCAAAAACAUGUUGAGAUUUUCCGUUGC
A.fumigatus_Af293_snoRNA UCUGAAuG.....CGCAAAACC-GUGUAGAGAUUUUCCGUUGC
S.pombe_snr52_snoRNA2  CCGAGA.G.....CGCAAAAAAUGUGUGGAUAUUUCCGUUGC
T.vaginalis_snoRNA     -----.g.....uauuUCCAUUGC
S.cerevisiae_Z13_snoRNA UCGAAA.Gauuuuaggauuag...aaaa.....acuUAUGUUGC
S.cerevisiae_snr52_snoRNA UCGAAA.Gauuuuaggauuag...aaaa.....acuUAUGUUGC
#=GC SS_cons           ----->>>>-----
#=GC MT_cons           .....|<18S_

S.pombe_Z13_snoRNA      CUUCCUUCUGAUUCAAAAAU
S.pombe_snr52_snoRNA   CUUCCUUCUGAUUCAAAAAU
N.crassa_CD42_snoRNA   CUUCCUUCUGAUC-----
A.fumigatus_Af293_snoRNA CUUCCUUCUGAUGA-----
S.pombe_snr52_snoRNA2  CUUCCUUCUGA-----
T.vaginalis_snoRNA     CUUCCUU-UGAUUUUUUGU
S.cerevisiae_Z13_snoRNA CUUCCUUCUGAA--A----
S.cerevisiae_snr52_snoRNA CUUCCUUCUGAA--A----
#=GC SS_cons           ----->>>>:
#=GC MT_cons           rRNA.>|DDDD.....
//

```

## References

1. Nawrocki EP, Kolbe DL, Eddy SR: **Infernal 1.0: inference of RNA alignments.** *Bioinformatics* 2009, **25**(10):1335-7.
